# Supplementary material
Source: publisher figshare collection journal article supplement (https://acs.figshare.com/ndownloader/files/26827849)
Supplement: Supplementary file 1 [file 26827849]

## Supporting Information

### Discovery of an orally efficacious positive allosteric modulator of the glucagon-like peptide-1 receptor

*Francis S. Willard,<sup>a†</sup> David B. Wainscott,<sup>a</sup> Aaron D. Showalter,<sup>b</sup> Cynthia Stutsman,<sup>b</sup>*

*Wenzhen Ma,<sup>b</sup> Guemalli R. Cardona,<sup>a</sup> Richard W. Zink,<sup>a</sup> Christopher M. Corkins,<sup>a</sup> Qi*

*Chen,<sup>a</sup> Nathan Yumibe,<sup>c</sup> Javier Agejas,<sup>d</sup> Graham R. Cumming,<sup>d</sup> José Miguel Minguez,<sup>d</sup>*

*Alma Jiménez,<sup>d</sup> Ana I. Mateo,<sup>d</sup> Ana M. Castaño,<sup>d</sup> Daniel A. Briere,<sup>b</sup> Kyle W. Sloop,<sup>b†</sup>*

*and Ana B. Bueno<sup>d† \*</sup>*

<sup>a</sup>Discovery Chemistry Research and Technologies, <sup>b</sup>Diabetes and Complications,<sup>c</sup>

Investigative Drug Disposition, Lilly Research Laboratories, Indianapolis, IN 46285 and

<sup>d</sup>Discovery Chemistry Research and Technologies, Lilly, S.A., Avda. de la Industria 30,

28108 Alcobendas, Madrid, Spain

\* To whom correspondence should be addressed. Dr. Ana Belén Bueno: phone, +34-

91-6633402; e-mail: [Bueno\\_Ana\\_Belen@lilly.com](mailto:Bueno_Ana_Belen@lilly.com).

## SUPPLEMENTARY MATERIAL

1. oGTT of LSN3318839 in GLP-1R KO mice
2. Selectivity data for LSN3318839

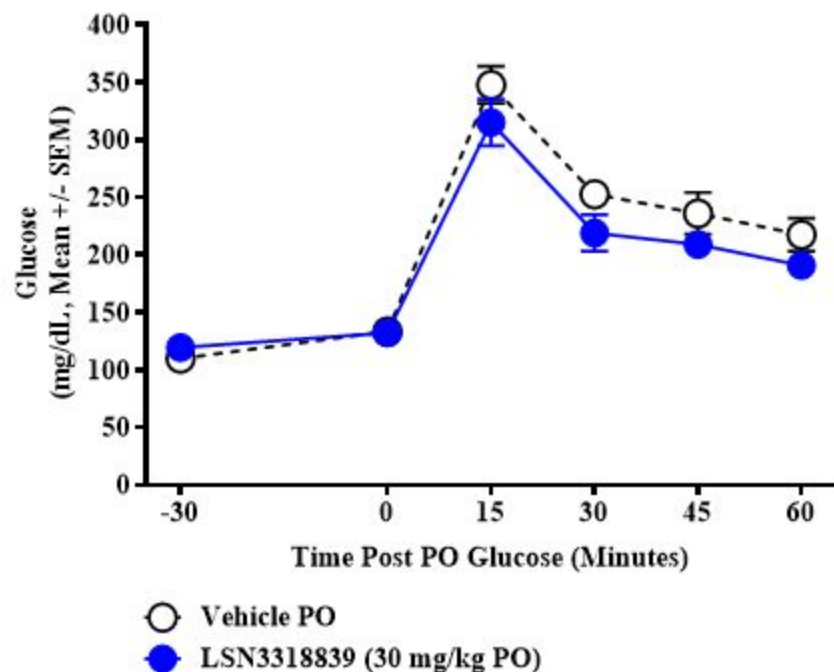

**Figure S1.** Time course of glucose levels in overnight-fasted GLP-1R KO mice treated orally with LSN3318839 alone followed 30 minutes later by an oral dose of dextrose (3 g/kg). Results are expressed as mean  $\pm$  S.E.M. No statistical significance was observed for any time point versus vehicle.

### Selectivity data for LSN3318839

Selectivity data was obtained at Eurofins (Luxembourg). All assays were using human receptors and channels. Assays tested: Cav1.2 (antagonist mode functional), ERG

(Dofetilide binding), NET (Nisoxetine binding), 5HT2B (agonist, PAM, and antagonist functional), ADORA3 (agonist, PAM, antagonist), ADRA1A (agonist, PAM, antagonist), ADRA2A (agonist, PAM, antagonist), ADRB1 (agonist, PAM, antagonist), ADRB2 (agonist, PAM, antagonist), D1 (agonist, PAM, antagonist), D2L (agonist, PAM, antagonist), H1 (agonist, PAM, antagonist), and OPRM1 (agonist, PAM, antagonist).

All tested assays were inactive (<50% inhibition at 1mM and 10 mM or  $EC_{50}/IC_{50} > 10$  mM) with the exceptions of: 5HT2B (PAM mode 14 % stimulation at 1 uM and 94 % stimulation at 10 mM), ADORA3 (Agonist mode 5% stimulation at 1 mM, 86% stimulation at 10 mM), D2L (Agonist mode 37% stimulation at 1 mM, 69% stimulation at 10 mM), D2L (PAM mode 31% stimulation at 1 mM, 51% stimulation at 10 mM), M2 (Agonist mode 40% stimulation at 1 mM, 59% stimulation at 10 mM).

Internal assays testing LSN3318839 in PAM mode using human receptors: 1uM or 10 uM concentration of LSN3318839 did not shift the  $EC_{50}$  of GIP (2-42) or Gcg (2-29) in the GIP-R and the Gcg-R respectively.
